# Supplementary material for: FABP5 in CESC counteracts drug-induced ROS-mediated cytotoxicity by regulating fatty acid β-oxidation
Source: Research Square preprint supplement (doi:10.21203/rs.3.rs-8161861/v1), 2025-12-10
Supplement: Supplementary file 1 [file 52ff3420ee8fd040777e7032.docx]

**Supplementary Materials**

**SFig.1** (**A-D**) Statistical analysis of flow cytometry results showing the proportion of cells expressing ROS after exposure to different concentrations of various drugs. ***, P < 0.001; ****, P < 0.0001.

**SFig. 2** (**A-D**) Statistical analysis of cell cycle differences between CDDP-treated cells and untreated cells across different cell groups. (E–H) Statistical analysis of cell cycle differences between PTX-treated cells and untreated cells across different cell groups. ns: no significance; *, P < 0.05; **, P < 0.01; ***, P < 0.001; ****, P < 0.0001.

**SFig. 3** (**A-B**) CCK-8 assay assessing proliferation of different cell lines following exposure to low-concentration CDDP. (**C-D**) CCK-8 assay assessing proliferation of different cell lines following exposure to low-concentration PTX. ns: no significance; *, P < 0.05; **, P < 0.01; ***, P < 0.001; ****, P < 0.0001.

**SFig. 4** (**A-B**) Oil red O staining experiments examined changes in intracellular lipids following exposure to low concentrations of CDDP in different cell types. (**C-D**) Oil red O staining experiments examined changes in intracellular lipids following exposure to low concentrations of PTX in different cell types.
